# Supplementary material for: Prostaglandin E‐major urinary metabolite diagnoses mucosal healing in patients with ulcerative colitis in remission phase
Source: PubMed Central journal article supplement — J Gastroenterol Hepatol. 2022 Feb 14;37(5):847–54. doi: 10.1111/jgh.15782 (PMC9303914; doi:10.1111/jgh.15782), 2022-02-14
Supplement: JGH-37-847-s001.pdf [file JGH-37-847-s001.pdf]

**Supplementary Table 1. Matts grading for histological evaluation**

|         |                                                                                                            |
|---------|------------------------------------------------------------------------------------------------------------|
| Grade 1 | Normal appearance                                                                                          |
| Grade 2 | Some infiltration of the mucosa or lamina propria<br>with either round cells or polymorphs                 |
| Grade 3 | Much cellular infiltration of the mucosa, lamina propria,<br>and submucosa                                 |
| Grade 4 | Presence of crypt abscesses with infiltration of all<br>layers of the mucosa                               |
| Grade 5 | Ulceration, erosion, or necrosis of the mucosa, with<br>cellular infiltration of some or all of its layers |
