# Supplementary material for: Prostaglandin E‐major urinary metabolite diagnoses mucosal healing in patients with ulcerative colitis in remission phase
Source: PubMed Central journal article supplement — J Gastroenterol Hepatol. 2022 Feb 14;37(5):847–54. doi: 10.1111/jgh.15782 (PMC9303914; doi:10.1111/jgh.15782), 2022-02-14
Supplement: JGH-37-847-s003.pdf [file JGH-37-847-s003.pdf]

**Supplementary Table 2. The characteristics of patients eligible for analysis**

|                                                          | Number          |
|----------------------------------------------------------|-----------------|
| Patients                                                 | N=128           |
| Age, y, mean $\pm$ SD                                    | 48.1 $\pm$ 14.2 |
| Sex, n (%)                                               |                 |
| Male                                                     | 75 (58.6)       |
| Female                                                   | 53 (41.4)       |
| Disease type, n (%)                                      |                 |
| Proctitis                                                | 18 (14.1)       |
| Left-sided colitis                                       | 31 (24.2)       |
| Pancolitis                                               | 77 (60.2)       |
| Right-sided colitis                                      | 2 (1.6)         |
| SCCAI score, n (%)                                       |                 |
| 0                                                        | 101 (78.9)      |
| 1                                                        | 19 (14.8)       |
| 2                                                        | 8 (6.3)         |
| MES points, n (%)                                        |                 |
| 0                                                        | 66 (51.6)       |
| 1                                                        | 41 (32.0)       |
| $\geq 2$                                                 | 21 (16.4)       |
| Patients from whom a biopsy specimen was obtained, n (%) | 121 (94.5)      |
| Obtained biopsy specimen, median, n (IQR)                | 4 (2-6)         |
| Matts grade, n (%)                                       |                 |
| 1                                                        | 25 (19.5)       |
| 2                                                        | 45 (35.2)       |
| $\geq 3$                                                 | 51 (39.8)       |
| Concomitant drug, n (%)                                  |                 |
| 5-ASA                                                    | 120 (91.6)      |
| Steroids                                                 | 10 (7.8)        |
| Anti-TNF-alfa-antibody                                   | 12 (9.4)        |
| Azathioprine                                             | 18 (14.1)       |

Abbreviations: ASA, aminosalicylic acid; IQR, interquartile range; MES, Mayo endoscopic subscore; SCCAI, simple clinical colitis activity index; SD, standard deviation; TNF, tumor necrosis factor
