# Supplementary figures and images for: Prostaglandin E‐major urinary metabolite diagnoses mucosal healing in patients with ulcerative colitis in remission phase
Source: PubMed Central journal article supplement — J Gastroenterol Hepatol. 2022 Feb 14;37(5):847–54. doi: 10.1111/jgh.15782 (PMC9303914; doi:10.1111/jgh.15782), 2022-02-14

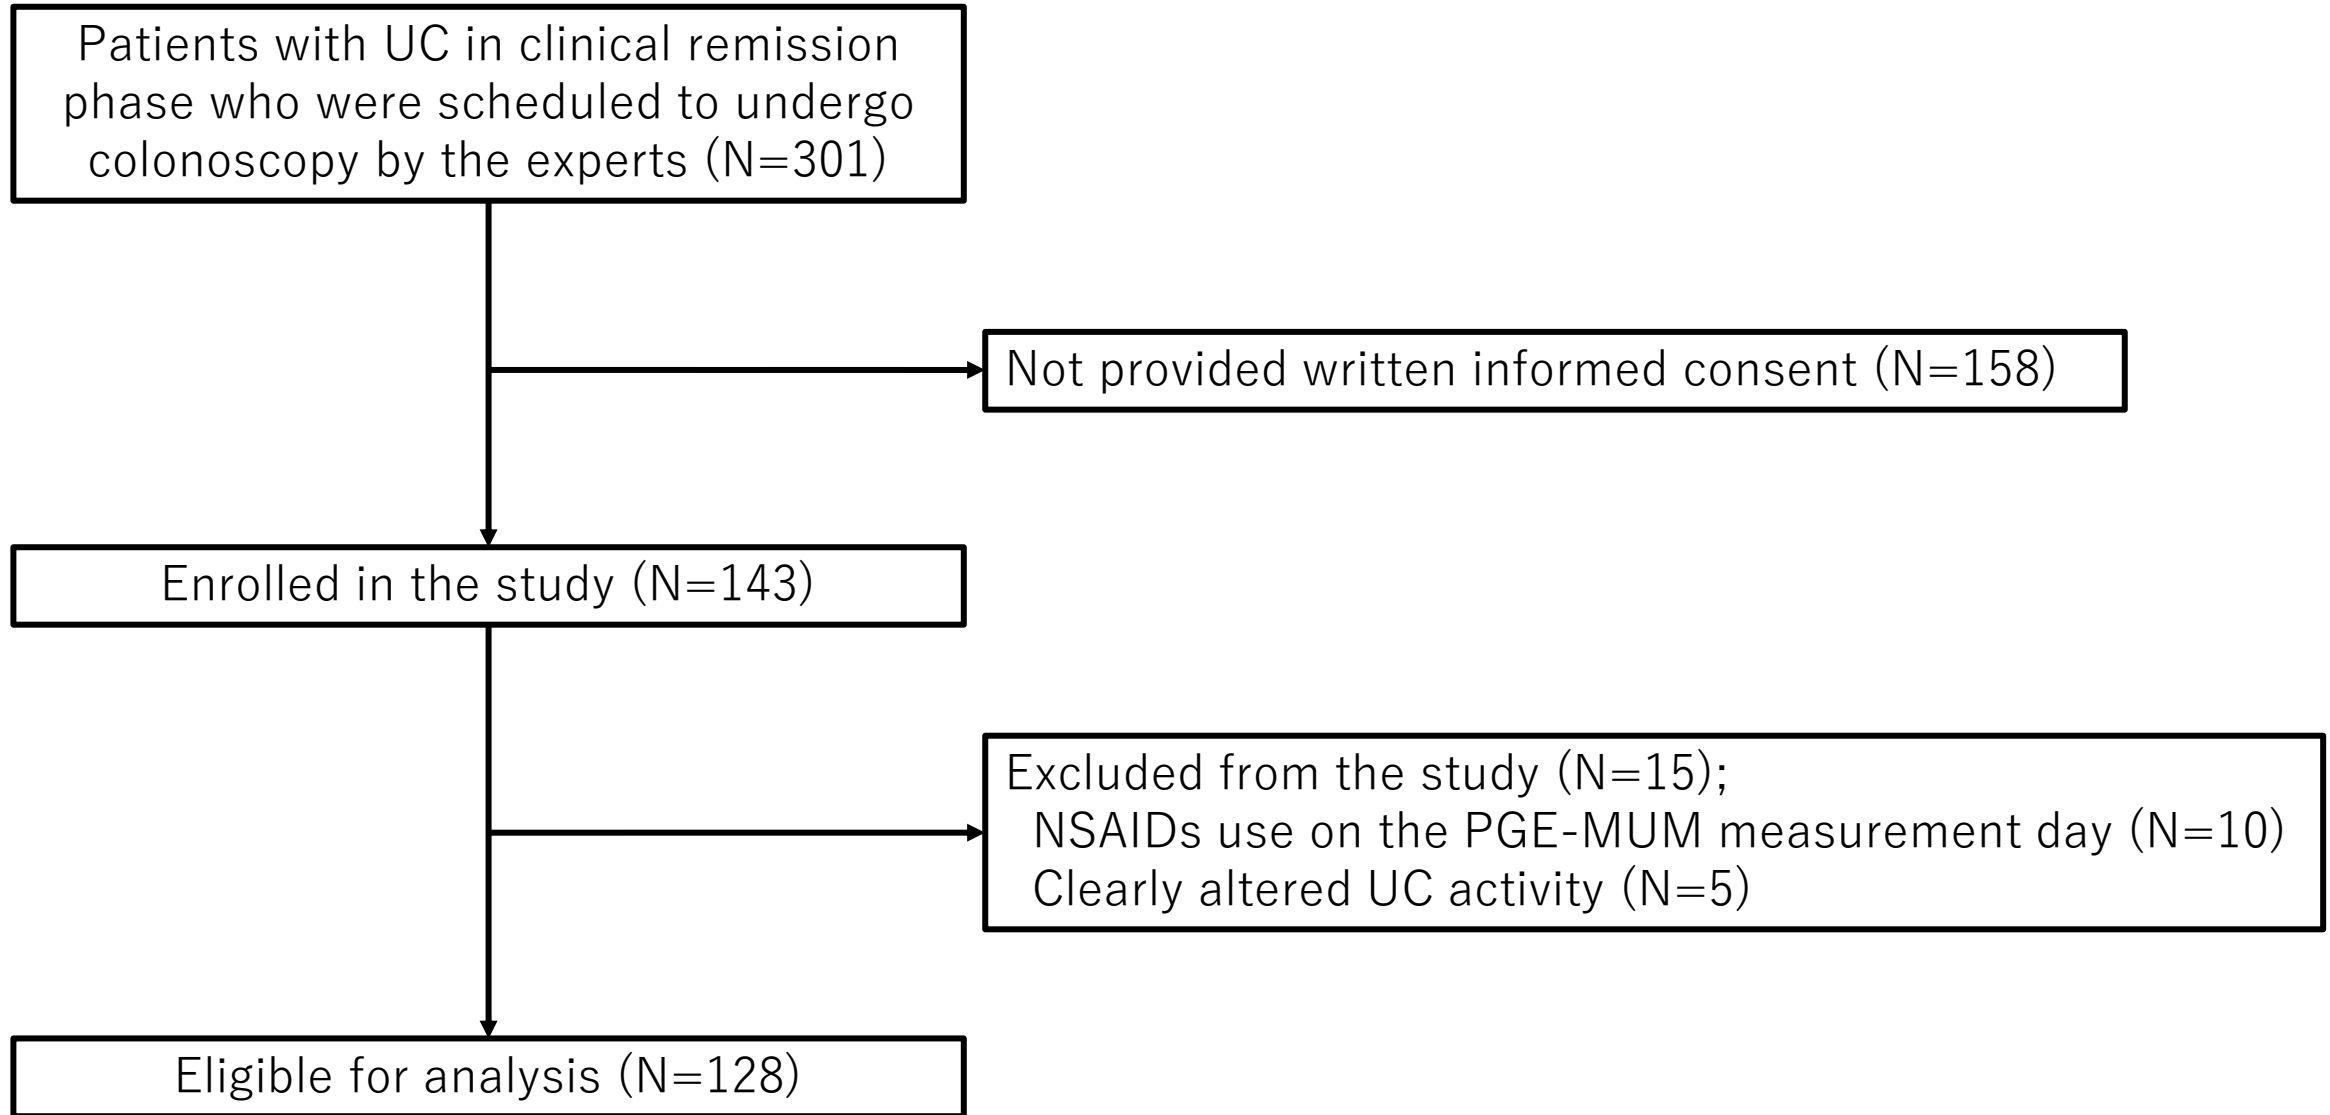

Supplement: JGH-37-847-s002.pdf [file JGH-37-847-s002.pdf]
